# Supplementary material
Source: publisher site journal article supplement (https://www.dovepress.com/get_supplementary_file.php?f=432635.docx)
Supplement: Supplementary file 1 [file get_supplementary_file.php]

Appendix A: Supplementary Table 1

Template for Intervention Description and Replication, (TIDieR) Criteria Applied to the Therapist Education and Massage for Parent Infant Outcomes (TEMPO) Intervention

| BRIEF NAME |  |
| --- | --- |
| Provide the name or a phrase that describes the intervention. | TEMPO - Therapist Education and Massage for Parent Infant Outcomes |
| WHY |  |
| Describe any rationale, theory, or goal of the elements essential to the intervention. | TEMPO is a therapist-led and parent-centered program designed to support parent mental health of extremely preterm infants by training them to deliver massage and other therapeutic interventions throughout infant hospitalization. TEMPO standardizes the nature and frequency of parent education through weekly therapy education sessions with a primary therapist. |
| WHAT |  |
| Materials: Describe any physical or informational materials used in the intervention, including those provided to participants or used in intervention delivery or in training of intervention providers. Provide information on where the materials can be accessed (e.g. online appendix, URL). | An 8-page *Early Parent Education* pamphlet outlining therapy scopes of practice, infant cues, and appropriate parent responses and activities to do with the infant.  Infant massage single page handout of *Massage+* protocol with pictures and instructions.  An 8-page *Discharge Parent Education* pamphlet outlining appropriate activities for home.  Bi-weekly emails sent to parent’s personal email address after hospital discharge to provide regular motor activity updates and massage tips based on the infant’s corrected age for 12 months post-discharge. |
| Procedures: Describe each of the procedures, activities, and/or processes used in the intervention, including any enabling or support activities. | Set-up: after informed consent was gained, the infant would be assigned a primary therapist, either the PT or OT from the infant’s primary team. The primary therapist then reached out to the parent via phone or at bedside to schedule the first Early Parent Education session.  Schedule: At each weekly visit, the primary therapist scheduled the following week’s visit with the parent. If the therapist was not available during the parent’s preferred time, then the other therapist from the infant’s team would facilitate the session. If any conflict prevented the scheduled session from happening, rescheduling a visit within the week would always be attempted. If rescheduling took place within the week, this did not count as a missed visit; however, if a rescheduled session could not take place within the week, this was considered a missed visit.  Weekly visits were arranged based on the infant’s care time and coordination with the nurse. Depending on the age and medical status of the infant, education sessions were scheduled prior to or during the nurse care time to optimize hands-on opportunities.  In addition to standard of therapy care, TEMPO included these components.   - ***Early Parent Education Session:*** A 30-minute education session initiated within one week of parent consent. A primary therapist who was a member of the study team, educated the parent about the importance of infant positioning, the impact of prematurity on the motor and sensory systems, and how to read and respond to infant behavioral-motor cues [(Sweeney, Heriza, Blanchard, & Dusing, 2010)](https://sciwheel.com/work/citation?ids=3015399&pre=&suf=&sa=0&dbf=0) using an 8-page pamphlet with pictures to supplement the verbal education. - ***Weekly Parent Education Sessions:*** Following the early parent education session, the primary therapist held weekly parent education sessions [(Khurana et al., 2020)](https://sciwheel.com/work/citation?ids=9530873&pre=&suf=&sa=0&dbf=0). At least 2 of these scheduled sessions included infant massage instruction at the infant’s bedside. On occasions when the parent was not available for in-person sessions due to illness (e.g., COVID+) or other conflicts, then the session was facilitated over video chat using an encrypted iPad. - ***Infant Massage Parent Education Sessions:*** Parent-administered infant massage was incorporated into the therapy plan of care when the infant could demonstrate physiologic stability and maintain a normal body temperature with reasonable support outside the incubator, usually ~33-34 weeks postmenstrual age (PMA). The therapist taught massage using the Massage+ protocol [(White‑Traut et al., 2021)](https://sciwheel.com/work/citation?ids=13880384&pre=&suf=&sa=0&dbf=0) over at least 2 parent education sessions. The therapist demonstrated massage on a doll using verbal cues and written instructions to guide the parent in administering massage on the infant. Once the therapist determined the parent’s ability to safely administer massage, parents were encouraged to practice infant massage at each bedside visit outside of TEMPO sessions. - ***Discharge Parent Education Session:*** Within the week of hospital discharge, the primary therapist facilitated a 30 minute face-to-face parent education session to review infant massage and age-appropriate motor activities for home [(Dusing, Murray, & Stern, 2008; Dusing, Van Drew, & Brown, 2012; Sweeney et al., 2010)](https://sciwheel.com/work/citation?ids=6951787,4186561,3015399&pre=&pre=&pre=&suf=&suf=&suf=&sa=0,0,0&dbf=0&dbf=0&dbf=0). An 8-page pamphlet outlining appropriate activities for home and therapist contact information was provided. - ***Bi-weekly emails:*** Parents received bi-weekly emails with motor activities and massage tips for the infant’s corrected age from hospital discharge through 12-months corrected age [(Spittle, Orton, Anderson, Boyd, & Doyle, 2015)](https://sciwheel.com/work/citation?ids=1524857&pre=&suf=&sa=0&dbf=0). - ***Parent Education Post-Discharge:*** The PI called the parent within 2 months of discharge to review the infant’s home program and massage techniques and to answer any questions. Therapist contact information and details of follow-up appointments were reviewed [(Spittle et al., 2015)](https://sciwheel.com/work/citation?ids=1524857&pre=&suf=&sa=0&dbf=0).   The components of standard of therapy care included:   - ***PT and OT Initial Assessment:*** Initiated within the first 72-96 hours of life (if infant medically stable) and included observation of passive and active movement, positioning assessment, infant behavioral-motor regulation and maturity, and infant response to developmental support [(E. Byrne & Campbell, 2013; Sweeney, Heriza, Blanchard, & American Physical Therapy Association, 2009; Sweeney et al., 2010)](https://sciwheel.com/work/citation?ids=4109644,3015399,38390&pre=&pre=&pre=&suf=&suf=&suf=&sa=0,0,0&dbf=0&dbf=0&dbf=0). - ***PT and OT Intervention at <33 weeks PMA:*** During hospitalization, infants received PT and OT intervention 4-5 times weekly (total) for approximately 15-30 minutes at a time. At <33 weeks PMA, the therapist provided developmental support, positioning consultation, and parent education as the parent is available [(E. Byrne & Campbell, 2013; Sweeney et al., 2009, 2010)](https://sciwheel.com/work/citation?ids=4109644,3015399,38390&pre=&pre=&pre=&suf=&suf=&suf=&sa=0,0,0&dbf=0&dbf=0&dbf=0). - ***PT and OT Re-assessment:*** Performed between 33-34 weeks PMA if infant was physiologically stable. Re-assessment included all components of initial assessment as well as evaluation of postural control in various positions, muscle tone and flexibility, active movement against gravity, and reflex development [(E. Byrne & Garber, 2013; Sweeney et al., 2010)](https://sciwheel.com/work/citation?ids=3015399,2808453&pre=&pre=&suf=&suf=&sa=0,0&dbf=0&dbf=0). - ***PT and OT Intervention >33 weeks PMA:*** Infants continued to receive combined PT or OT intervention 4-5 times weekly for approximately 30 minutes. At >33 weeks PMA, the therapist provided more advanced therapeutic interventions to facilitate midline orientation, encourage active movement and postural activation, and address any muscular tightness with stretching as needed [(E. Byrne & Garber, 2013)](https://sciwheel.com/work/citation?ids=2808453&pre=&suf=&sa=0&dbf=0). - ***Discharge Education:*** In standard of care therapy, the PT or OT reviewed a 2-page handout with the parent if they are available at the bedside the week of discharge. If the parent was not available, then the handout was left at the bedside for parent review along with therapist contact information for questions [(E. M. Byrne, Sweeney, Schwartz, Umphred, & Constantinou, 2019)](https://sciwheel.com/work/citation?ids=7172427&pre=&suf=&sa=0&dbf=0). - ***<4 month and 12-month Follow-Up Visits:*** The Special Infant Care Clinic is a multidisciplinary follow-up clinic that follows the neurodevelopment of preterm infants discharged from the NCCC. At these visits, scheduled based on the infant’s corrected age, the PT or OT screened infants for motor delays and addressed any safety concerns, infant changes, and/or parent questions. The Bayley Scales of Infant Development IV was conducted at the 12 month visit [(R. Byrne, Noritz, Maitre, & NCH Early Developmental Group, 2017)](https://sciwheel.com/work/citation?ids=4409320&pre=&suf=&sa=0&dbf=0). |
| WHO PROVIDED |  |
| For each category of intervention provider (e.g. psychologist), describe their expertise, background and any specific training given. | The parent education sessions were led by a physical or occupational therapist who held a Masters or Doctoral degree in their respective fields. All PTs and OTs providing TEMPO intervention exclusively provided care in the NICU setting.  Each therapist was trained by the PI to use the Massage+ protocol as well as how to use the Early Parent Education and Discharge packets, which were created with evidence-based concepts.  The NICU Family Advisory Board, made up of parents of preterm infants, reviewed the written materials and offered no substantive changes. |
| HOW |  |
| Describe the modes of delivery (e.g. face-to-face or by some other mechanism, such as internet or telephone) of the intervention and whether it was provided individually or in a group. | Mode of delivery: Face-to-face therapist to parent education session involving hands-on care for the infant. If the parent was not available, video visits were facilitated via iPad.  Prior to 33 weeks PMA, education sessions focused on general education about preterm movement patterns and behavior, infant cues, and appropriate responses, handling, and activities for parent engagement.  At 33-34 weeks PMA if the infant could demonstrate physiologic stability and maintain a normal body temperature with reasonable support outside the incubator, the therapist taught massage using the Massage+ protocol [(White‑Traut et al., 2021)](https://sciwheel.com/work/citation?ids=13880384&pre=&suf=&sa=0&dbf=0) over at least 2 parent education sessions. The therapist demonstrated massage on a doll using verbal cues and written instructions to guide the parent in administering massage on the infant. Once the therapist determined the parent’s ability to safely administer massage, parents were encouraged to practice infant massage at each bedside visit outside of TEMPO sessions.  After the infant massage education sessions at >33 weeks PMA, parent education sessions focused more on advancing therapeutic handling skills to facilitate midline orientation, encourage active movement and postural activation, and address any individual infant motor or sensory concerns. |
| WHERE |  |
| Describe the type(s) of location(s) where the intervention occurred, including any necessary infrastructure or relevant features. | All parent education sessions took place at the infant’s bedside or individual room depending on the infant’s location within the NICU. |
| WHEN and HOW MUCH |  |
| Describe the number of times the intervention was delivered and over what period of time including the number of sessions, their schedule, and their duration, intensity or dose. | Parent education sessions varied in length from 15 minutes to 1 hour depending on a variety of factors including 1) infant age, 2) infant medical status, 3) infant’s schedule of procedures, and 4) type of intervention being delivered. For example, massage and developmental play interventions usually required more time because of the set up and active engagement with the infant required.  Parent educations sessions happened weekly from the time of parent consent (within 4 weeks of birth), until discharge. Generally, sessions took place Monday-Friday between 7:30 am and 5:00 pm according to the therapist work schedule and parent availability. On average, this was over a period of 11 weeks and 11 total sessions. |
| TAILORING |  |
| If the intervention was planned to be personalised, titrated or adapted, then describe what, why, when, and how. | Both infant tolerance and parent learning styles were considered at each session.  Therapists tailored each session to how readily the infant could safely engage with the parent and therapist based on medical status, infant cues, and nursing report including previous events of the day.  All therapists were trained in use of parent-friendly language to facilitate learning, and multiple educational strategies were employed to best match the parent’s needs (eg., demonstration, written explanation, verbal explanation, visual pamphlet). |
| MODIFICATIONS |  |
| If the intervention was modified during the course of the study, describe the changes (what, why, when, and how). | No modifications made to the structure, sequence, or content of the TEMPO intervention.  Therapists were substituted from the infant’s primary team if there was a scheduling conflict. This means that even the substitute therapist was a member of the infant’s team and had knowledge of the infant’s medical history and plan of care.  One minor change included the PI asking primary therapists to remind parents at the weekly parent education sessions to complete the beside activity logs. This slight modification took place after approximately 3 dyads had completed the intervention to improve parent adherence to filling out bedside activity logs. |
| HOW WELL |  |
| Planned: If intervention adherence or fidelity was assessed, describe how and by whom, and if any strategies were used to maintain or improve fidelity, describe them. | All therapists were trained and supported by the first author across delivery of all parent education sessions.  A trained research assistant collected bedside logs once a week and transferred the log data to an electronic record. |
| Actual: If intervention adherence/fidelity was assessed, describe the extent to it was delivered as planned. | A high level of both therapist and parent adherence was achieved (see publications for details on visits met vs. visits missed and parent adherence to activities recommended by the therapist) |

**Appendix B. Review Meeting Discussion Guide**

| **Spanish** | **English** |
| --- | --- |
| ¿Que piensa sobre estos materiales? ¿Que siente y que pensamientos tiene sobre los materiales? | *What do you think about these materials? What are your feelings and thoughts about them?* |
| ¿Cómo les parece la manera en que están escritos los materiales? Por ejemplo, son generalmente agradables, el idioma es respetuoso, demasiado formal, ¿o demasiado coloquial? | *What is your take on the materials’ writing style? For example, is the writing style generally friendly, respectful, too formal, or too familiar?* |
| ¿El idioma y la terminología son culturalmente apropiados? | *Are the language and terminology culturally appropriate?* |
| ¿Hay algo desagradable u ofensivo? | *Is there anything disagreeable or offensive?* |
